# Supplementary material
Source: Springer Nature journal article supplement (https://www.springermedizin.de/resource/supplementary/13054_2011_552_MOESM6_ESM.pdf/9708758)

| Study                                                          | Restrictive |       | Routine    |       | Total      | Weight        | Mean Difference<br>[95% CI] |
|----------------------------------------------------------------|-------------|-------|------------|-------|------------|---------------|-----------------------------|
|                                                                | Mean        | SD    | Mean       | SD    |            |               |                             |
| <b>Primary analysis: trials</b>                                |             |       |            |       |            |               |                             |
| Krivopal et al, 2003                                           | 16.45       | 11.87 | 19.34      | 10.65 | 43         | 81.6%         | -2.89 [-7.44, 1.66]         |
| Clec'h et al, 2008                                             | 39.5        | 29.4  | 40.3       | 33.3  | 84         | 18.4%         | -0.80 [-10.38, 8.78]        |
| <b>Patients</b>                                                |             |       | <b>132</b> |       | <b>127</b> | <b>100.0%</b> | <b>-2.50 [-6.62, 1.61]</b>  |
| <b>Overall effect: p=0.23; heterogeneity: I<sup>2</sup>=0%</b> |             |       |            |       |            |               |                             |

#### Sensitivity analysis: trials and observational studies

|                                                                 |       |       |             |       |             |               |                            |
|-----------------------------------------------------------------|-------|-------|-------------|-------|-------------|---------------|----------------------------|
| Rao et al, 1997                                                 | 5.9   | 1.5   | 6.1         | 1.6   | 100         | 39.0%         | -0.20 [-0.63, 0.23]        |
| Price et al, 1999                                               | 12.1  | 2.8   | 11.3        | 3.1   | 1839        | 40.9%         | 0.80 [0.60, 1.00]          |
| Leong et al, 2000                                               | 7.6   | 6.6   | 11.1        | 10.3  | 100         | 13.8%         | -3.50 [-5.90, -1.10]       |
| Krivopal et al, 2003                                            | 16.45 | 11.87 | 19.34       | 10.65 | 43          | 5.0%          | -2.89 [-7.44, 1.66]        |
| Clec'h et al, 2008                                              | 39.5  | 29.4  | 40.3        | 33.3  | 84          | 1.3%          | -0.80 [-10.38, 8.78]       |
| <b>Patients</b>                                                 |       |       | <b>1920</b> |       | <b>2166</b> | <b>100.0%</b> | <b>-0.39 [-1.48, 0.70]</b> |
| <b>Overall effect: p=0.48; heterogeneity: I<sup>2</sup>=87%</b> |       |       |             |       |             |               |                            |

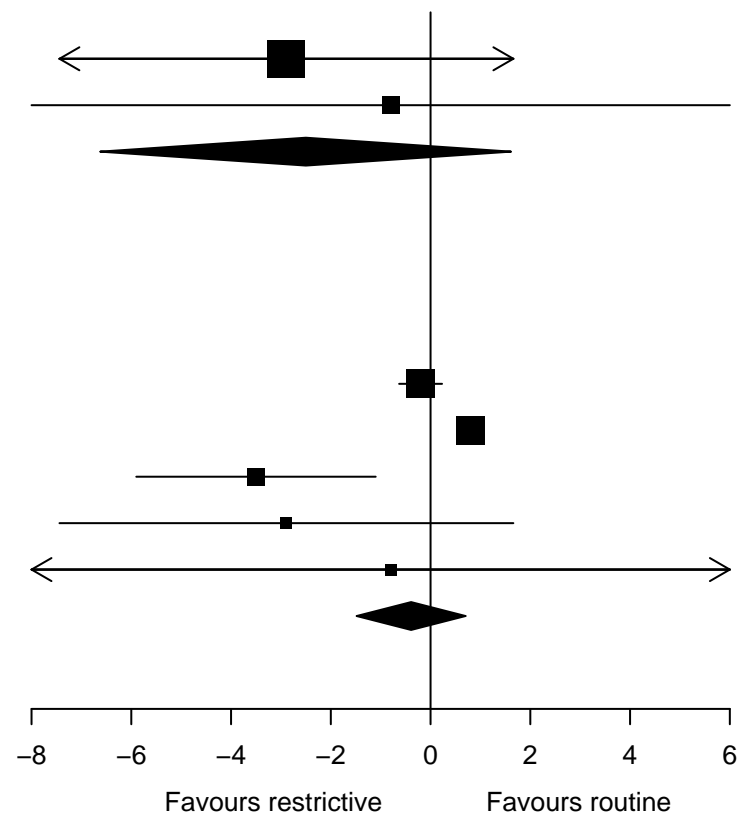

Supplement: MOESM6 [file 9708758]
